# Supplementary material for: Unraveling the impact of different liposomal formulations on the plasma protein corona composition might give hints on the targeting capability of nanoparticles
Source: Royal Society of Chemistry journal article supplement (doi:10.1039/d4na00345d), 2024-01-01
Supplement: d4na00345d1.pdf [file d4na00345d1.pdf]

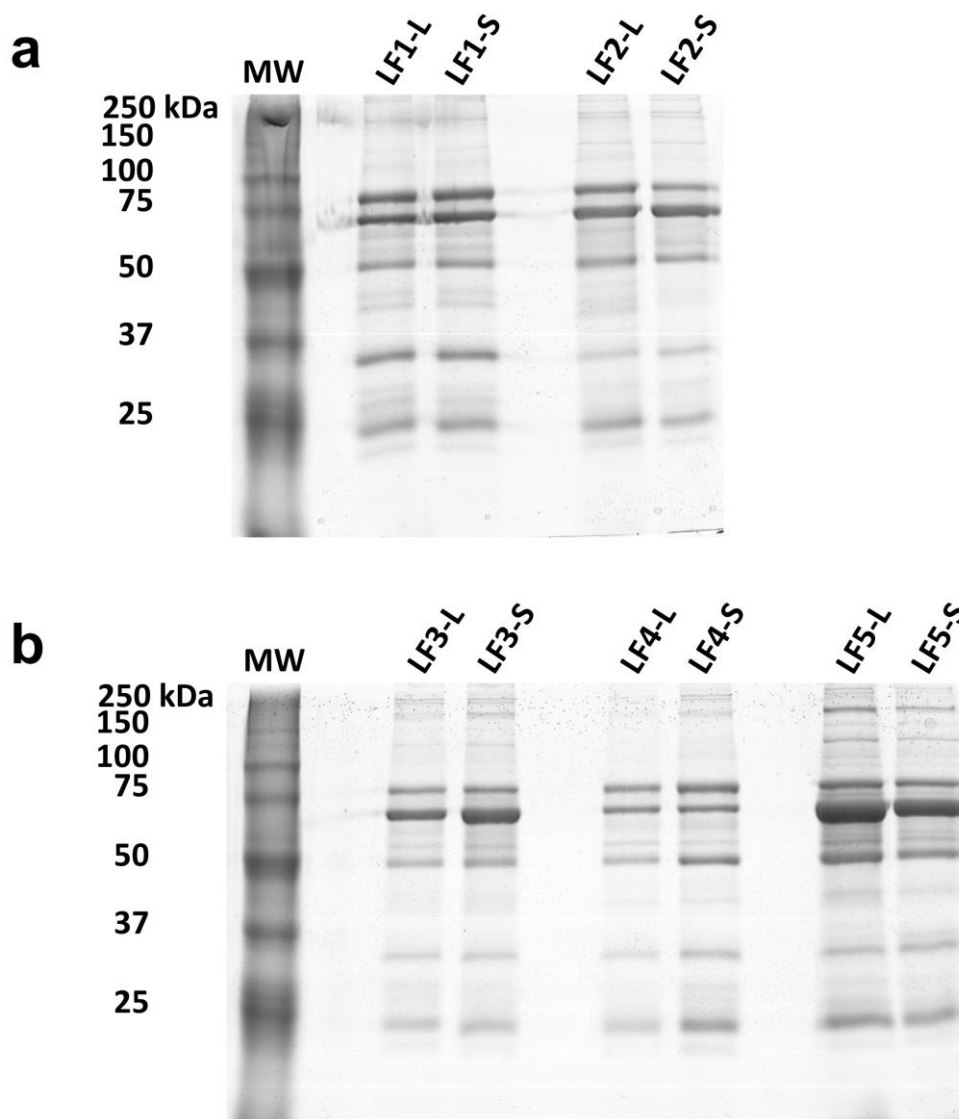

**Supplementary Figure S1. SDS-PAGE analysis of PrC.** Protein components were adsorbed on (a) LF1/2 and (b) LF3/4/5, each of them extruded at 200 and 100 nm (LFs-L and LFs-S, respectively), and then separated by SDS-PAGE 12% (v/v). Protein bands were stained with Colloid Blue Stain Reagent and identified by LC-MS/MS analysis.

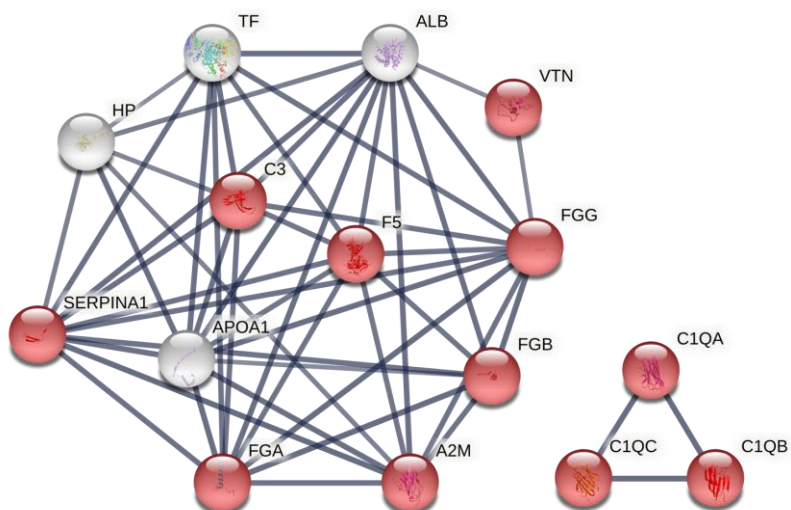

**Supplementary Figure S2. STRING network analysis of PrC components identified with different relative abundance.** Red nodes correspond to proteins we identified that are involved in “complement and coagulation cascades” pathway. The networks were built by setting an interaction score of 0.7 (high-confidence) and the following sources: neighborhood, co-occurrence, co-expression, experiments and databases.



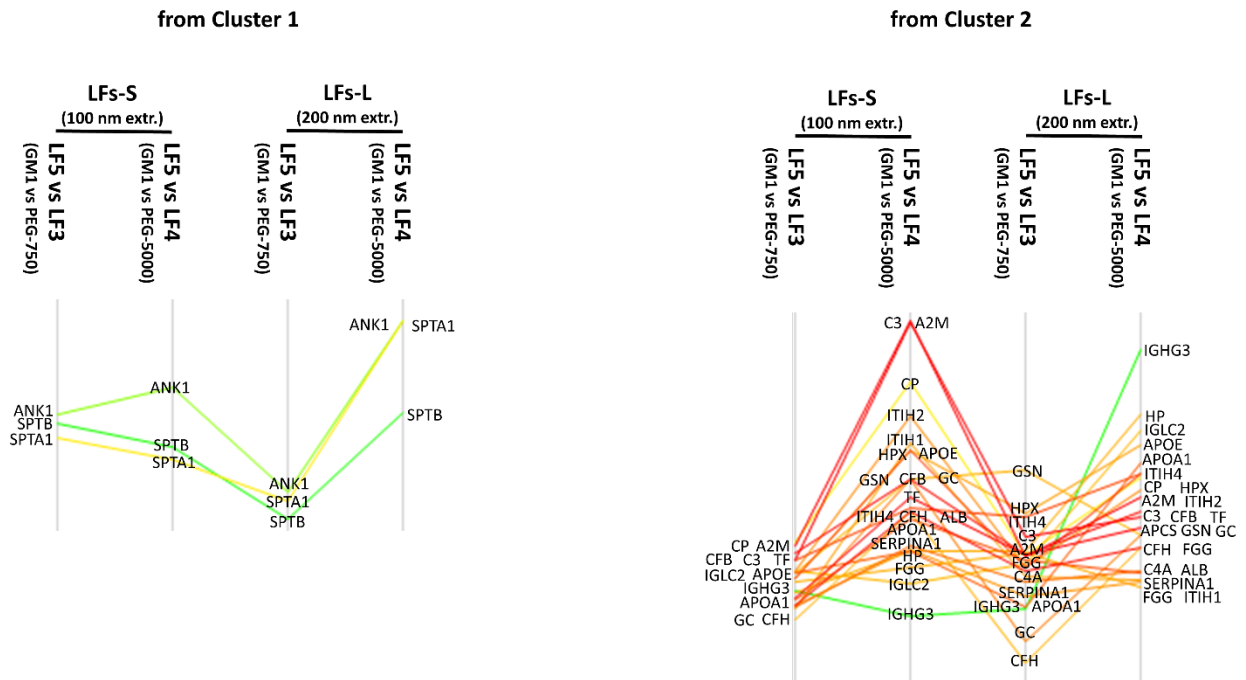

**Supplementary Figure S4. Profile plots of proteins of Cluster 1 and 2.** The profile plots shown as left inserts in Figure 4a are hereby magnificated and for each of the four points (i.e. the four binary comparisons) of the plots most of the different proteins are indicated. Only proteins with similar profiles were included in the profile plots.

**Supplementary Table 1S.** Identification of PrC components for LF1-L and LF1-S, extruded at 200 nm and 100 nm (Large and Small size, respectively).

| Uniprot    | Protein                                                          | Gene     | MW <sup>a</sup> | Mascot Score (Peptides)<br>LF1-S | Mascot Score (Peptides)<br>LF1-L |
|------------|------------------------------------------------------------------|----------|-----------------|----------------------------------|----------------------------------|
| P07996     | Thrombospondin-1 precursor                                       | THBS1    | 133291          | N.D. <sup>b</sup>                | 274 (4)                          |
| Q14624     | Inter-alpha-trypsin inhibitor heavy chain H4 isoform 1 precursor | ITIH4    | 103549          | N.D. <sup>b</sup>                | 245 (4)                          |
| P19827     | Inter-alpha-trypsin inhibitor heavy chain H1                     | ITIH1    | 101389          | N.D. <sup>b</sup>                | 122 (2)                          |
| P19823     | Inter-alpha-trypsin inhibitor heavy chain H2 precursor           | ITIH2    | 103549          | N.D. <sup>b</sup>                | 107 (2)                          |
| P11277     | Spectrin beta chain, erythrocytic                                | SPTB     | 247171          | N.D. <sup>b</sup>                | 225 (4)                          |
| P02549     | Spectrin alpha chain, erythrocytic 1                             | SPTA1    | 282024          | N.D. <sup>b</sup>                | 109 (2)                          |
| P16157     | Ankyrin-1                                                        | ANK1     | 209476          | N.D. <sup>b</sup>                | 102 (2)                          |
| P00450     | Ceruloplasmin                                                    | CP       | 116197          | N.D. <sup>b</sup>                | 101 (2)                          |
| P12259     | Coagulation factor V                                             | F5       | 252732          | 1455 (24)                        | 2604 (41)                        |
| P01023     | Alpha-2-macroglobulin                                            | A2M      | 164600          | 242 (4)                          | 525 (8)                          |
| P02730     | Solute carrier family 4, anion exchanger, member 1               | SLC4A1   | 102053          | 386 (6)                          | 515 (9)                          |
| P01591     | Immunoglobulin J chain                                           | IGJ      | 18099           | 131 (2)                          | 247 (4)                          |
| P02747     | Complement C1q subcomponent subunit C                            | C1QC     | 25985           | 112 (2)                          | 292 (5)                          |
| P04196     | Histidine-rich glycoprotein precursor                            | HRG      | 60510           | 123 (2)                          | 278 (4)                          |
| P04004     | Vitronectin                                                      | VTN      | 55106           | 198 (3)                          | 287 (5)                          |
| P02679     | Fibrinogen gamma chain                                           | FGG      | 50077           | 221 (4)                          | 226 (4)                          |
| P10909     | Clusterin                                                        | CLU      | 52495           | 196 (3)                          | 222 (4)                          |
| P0DOX2     | Immunoglobulin alpha-2 heavy chain                               | IGHA2    | 48934           | 363 (6)                          | 342 (5)                          |
| P01860     | Ig gamma-3 chain C region                                        | IGHG3    | 41287           | 487 (8)                          | 388 (6)                          |
| P60709     | Actin, cytoplasmic 1                                             | ACTB     | 42052           | 263 (5)                          | 247 (4)                          |
| P00738     | Haptoglobin                                                      | HP       | 45860           | 270 (5)                          | 278 (5)                          |
| P02746     | Complement C1q subcomponent subunit B                            | C1QB     | 24154           | 186 (3)                          | 246 (4)                          |
| P02768     | Serum albumin                                                    | ALB      | 68239           | 1120 (17)                        | 1199 (18)                        |
| O43866     | CD5 antigen-like                                                 | CD5L     | 39603           | 411 (6)                          | 423 (6)                          |
| P02647     | Apolipoprotein A-I                                               | APOA1    | 30759           | 356 (5)                          | 501 (7)                          |
| P02787     | Serotransferrin                                                  | TF       | 79280           | 1054 (16)                        | 681 (11)                         |
| P01009     | Alpha-1-antitrypsin                                              | SERPINA1 | 46848           | 362 (5)                          | 322 (5)                          |
| Q15485     | Ficolin-2 isoform a precursor                                    | FCN2     | 34436           | 133 (2)                          | 262 (4)                          |
| P01871     | Immunoglobulin heavy constant mu                                 | IGHM     | 49440           | 1057 (16)                        | 1085 (18)                        |
| P02671     | Fibrinogen alpha chain                                           | FGA      | 70223           | 107 (2)                          | 128 (2)                          |
| P18428     | Lipopolysaccharide binding protein                               | LBP      | 53533           | 341 (5)                          | 281 (5)                          |
| P02745     | Complement C1q subcomponent subunit A precursor                  | C1QA     | 26285           | 142 (3)                          | 101 (2)                          |
| P01024     | Complement component C3                                          | C3       | 114238          | 534 (8)                          | 494 (9)                          |
| P01624     | Immunoglobulin kappa variable 3-15                               | IGKV3-15 | 12496           | 107 (2)                          | 109 (2)                          |
| A0A0C4DH29 | Immunoglobulin heavy variable 1-3                                | IGHV1-3  | 13008           | 136 (2)                          | 126 (2)                          |
| P01834     | Immunoglobulin kappa constant                                    | IGKC     | 11765           | 494 (7)                          | 427 (6)                          |
| O75636     | Ficolin-3                                                        | FCN3     | 33395           | 331 (5)                          | 429 (7)                          |
| P02649     | Apolipoprotein E                                                 | APOE     | 36302           | 667 (10)                         | 594 (8)                          |
| P02675     | Fibrinogen beta chain                                            | FGB      | 52908           | 630 (10)                         | 617 (10)                         |
| P04003     | C4b-binding protein alpha chain precursor                        | C4BPA    | 69042           | 235 (4)                          | 199 (3)                          |
| P02790     | Hemopexin precursor, partial                                     | HPX      | 52254           | 162 (3)                          | 106 (2)                          |
| P02774     | Serum vitamin D-binding protein precursor                        | GC       | 54612           | 338 (6)                          | 166 (3)                          |
| P01011     | Alpha-1-antichymotrypsin                                         | SERPINA3 | 40690           | 131 (2)                          | N.D. <sup>b</sup>                |
| P04114     | Apolipoprotein B-100 precursor                                   | APOB     | 516634          | 198 (3)                          | N.D. <sup>b</sup>                |

<sup>a</sup>Theoretical MW; <sup>b</sup>Not determined.

**Supplementary Table 2S.** Identification of PrC components for LF2-L and LF2-S, extruded at 200 nm and 100 nm (Large and Small size, respectively).

| Uniprot | Protein                                      | Gene     | MW <sup>a</sup> | Mascot Score (Peptides) LF2-S | Mascot Score (Peptides) LF2-L |
|---------|----------------------------------------------|----------|-----------------|-------------------------------|-------------------------------|
| P11277  | Spectrin beta chain, erythrocytic            | SPTB     | 247171          | N.D. <sup>b</sup>             | 750 (13)                      |
| P02763  | Alpha-1-acid glycoprotein 1                  | ORM1     | 22868           | N.D. <sup>b</sup>             | 159 (3)                       |
| P02746  | Complement C1q subcomponent subunit B        | C1QB     | 24154           | N.D. <sup>b</sup>             | 172 (3)                       |
| P16157  | Ankyrin-1                                    | ANK1     | 209476          | N.D. <sup>b</sup>             | 318(5)                        |
| P04196  | Histidine-rich glycoprotein precursor        | HRG      | 60510           | N.D. <sup>b</sup>             | 224 (3)                       |
| P00450  | Ceruloplasmin                                | CP       | 116197          | N.D. <sup>b</sup>             | 250 (4)                       |
| P07996  | Thrombospondin-1                             | THBS1    | 133291          | N.D. <sup>b</sup>             | 247 (4)                       |
| O14791  | Apolipoprotein L1                            | APOL1    | 42357           | N.D. <sup>b</sup>             | 123 (2)                       |
| P04003  | C4b-binding protein alpha chain              | C4BPA    | 67033           | N.D. <sup>b</sup>             | 144 (2)                       |
| P04217  | Alpha-1-B-glycoprotein                       | A1BG     | 52479           | N.D. <sup>b</sup>             | 110 (2)                       |
| P01591  | Immunoglobulin J chain                       | IGJ      | 18099           | 131 (2)                       | 235 (4)                       |
| P01871  | Immunoglobulin heavy constant mu             | IGHM     | 49440           | 968 (16)                      | 1200 (19)                     |
| P04004  | Vitronectin                                  | VTN      | 55106           | 125 (2)                       | 313 (5)                       |
| P02745  | Complement C1q subcomponent subunit A        | C1QA     | 26285           | 46 (1)                        | 98 (2)                        |
| P01876  | Ig alpha-1 chain C region                    | IGHA1    | 37655           | 304 (5)                       | 313 (5)                       |
| P02647  | Apolipoprotein A-I                           | APOA1    | 30759           | 395 (5)                       | 351 (5)                       |
| P00751  | Complement factor B                          | CFB      | 86819           | 135 (2)                       | 203 (3)                       |
| P01859  | Ig gamma-2 chain C region                    | IGHG2    | 35901           | 385 (7)                       | 338 (6)                       |
| P02774  | Vitamin D-binding protein                    | GC       | 54612           | 103 (2)                       | 266 (4)                       |
| P01011  | Alpha-1-antichymotrypsin                     | SERPINA3 | 40690           | 188 (3)                       | 121 (2)                       |
| P0CG05  | Ig lambda-2 chain C regions                  | IGLC2    | 11294           | 91 (2)                        | 175 (3)                       |
| P02549  | Spectrin alpha chain, erythrocytic 1         | SPTA1    | 282024          | 558 (9)                       | 585 (11)                      |
| P0C0L4  | Complement C4-A                              | C4A      | 69042           | 256 (4)                       | 269 (4)                       |
| P01024  | Complement C3                                | C3       | 114238          | 474 (8)                       | 497 (8)                       |
| P02787  | Serotransferrin                              | TF       | 79280           | 928 (14)                      | 723 (11)                      |
| P01023  | Alpha-2-macroglobulin                        | A2M      | 164600          | 861 (14)                      | 493 (8)                       |
| P19823  | Inter-alpha-trypsin inhibitor heavy chain H2 | ITIH2    | 103549          | 311 (5)                       | 140 (2)                       |
| Q14624  | Inter-alpha-trypsin inhibitor heavy chain H4 | ITIH4    | 103549          | 224 (3)                       | 123 (2)                       |
| P01834  | Immunoglobulin kappa constant                | IGKG     | 11765           | 423 (6)                       | 525 (8)                       |
| P32119  | Peroxiredoxin-2                              | PRDX2    | 20209           | 187 (3)                       | 196 (3)                       |
| P01009  | Alpha-1-antitrypsin                          | SERPINA1 | 46848           | 390 (6)                       | 413 (7)                       |
| P19827  | Inter-alpha-trypsin inhibitor heavy chain H1 | ITIH1    | 86480           | 413 (6)                       | 294 (5)                       |
| P02768  | Serum albumin                                | ALB      | 68239           | 1409 (22)                     | 1189 (19)                     |
| P12259  | Coagulation factor V                         | F5       | 252732          | 898 (15)                      | 870 (15)                      |
| P02679  | Fibrinogen gamma chain                       | FGG      | 50077           | 301 (5)                       | 182 (3)                       |
| P02730  | Band 3 anion transport protein               | SLC4A1   | 102053          | 623 (10)                      | 407 (7)                       |
| O43866  | CD5 antigen-like                             | CD5L     | 39603           | 284 (4)                       | 137 (2)                       |
| P60709  | Actin, cytoplasmic 1                         | ACTB     | 42052           | 218 (4)                       | 281 (5)                       |
| P00738  | Haptoglobin                                  | HP       | 45860           | 195 (3)                       | 137 (2)                       |
| P02747  | Complement C1q subcomponent subunit C        | C1QC     | 25985           | 264 (5)                       | 132 (2)                       |
| P02649  | Apolipoprotein E                             | APOE     | 36302           | 493 (8)                       | 282 (5)                       |
| P02675  | Fibrinogen beta chain                        | FGB      | 52908           | 754 (11)                      | 457 (7)                       |
| O75636  | Ficolin-3                                    | FCN3     | 33395           | 375 (6)                       | 152 (3)                       |
| P04040  | Catalase                                     | CAT      | 51550           | 148 (2)                       | N.D. <sup>b</sup>             |
| P10909  | Clusterin                                    | CLU      | 52495           | 119 (2)                       | N.D. <sup>b</sup>             |
| P02671  | Fibrinogen alpha chain                       | FGA      | 70223           | 103 (2)                       | N.D. <sup>b</sup>             |

|        |                                   |       |       |         |                   |
|--------|-----------------------------------|-------|-------|---------|-------------------|
| P01782 | Immunoglobulin heavy variable 3-9 | IGHV3 | 12945 | 190 (3) | N.D. <sup>b</sup> |
| P02743 | Serum amyloid P-component         | APCS  | 25495 | 240 (4) | N.D. <sup>b</sup> |
| Q15485 | Ficolin-2                         | FCN2  | 34436 | 173 (3) | N.D. <sup>b</sup> |

<sup>a</sup>Theoretical MW; <sup>b</sup>Not determined.

**Supplementary Table 3S.** Identification of PrC components for LF3-L and LF3-S, extruded at 200 nm and 100 nm (Large and Small size, respectively).

| Uniprot | Protein                                      | Gene     | MW <sup>a</sup> | Mascot Score (Peptides)<br>LF3-S | Mascot Score (Peptides)<br>LF3-L |
|---------|----------------------------------------------|----------|-----------------|----------------------------------|----------------------------------|
| Q15485  | Ficolin-2                                    | FCN2     | 34436           | N.D. <sup>b</sup>                | 183 (3)                          |
| Q03591  | Complement factor H-related protein 1        | CFHR1    | 38766           | N.D. <sup>b</sup>                | 201 (3)                          |
| P04196  | Histidine-rich glycoprotein precursor        | HRG      | 60510           | N.D. <sup>b</sup>                | 194 (3)                          |
| P15924  | Desmoplakin I                                | DSP      | 334023          | N.D. <sup>b</sup>                | 98 (2)                           |
| P04083  | Annexin A1                                   | ANXA1    | 38918           | N.D. <sup>b</sup>                | 123 (2)                          |
| P01011  | Alpha-1-antichymotrypsin                     | SERPINA3 | 40690           | N.D. <sup>b</sup>                | 114 (2)                          |
| P07900  | Heat shock protein HSP 90-alpha              | HSP90AA1 | 98652           | N.D. <sup>b</sup>                | 132 (2)                          |
| P11277  | Spectrin beta chain, erythrocytic            | SPTB     | 247171          | 253 (4)                          | 775 (13)                         |
| P07996  | Thrombospondin-1                             | THBS1    | 133291          | 261 (5)                          | 580 (10)                         |
| P10909  | Clusterin                                    | CLU      | 32628           | 62 (1)                           | 116 (2)                          |
| P02747  | Complement C1q subcomponent subunit C        | C1QC     | 25985           | 135 (2)                          | 265 (4)                          |
| P01591  | Immunoglobulin J chain                       | IGJ      | 18099           | 82 (1)                           | 135 (2)                          |
| P08603  | Complement factor H                          | CFH      | 139096          | 77 (1)                           | 183 (3)                          |
| P02675  | Fibrinogen beta chain                        | FGB      | 52908           | 380 (6)                          | 746 (11)                         |
| P02730  | Band 3 anion transport protein               | SLC4A1   | 102053          | 266 (5)                          | 599 (9)                          |
| P16157  | Ankyrin-1                                    | ANK1     | 209476          | 225 (4)                          | 443 (7)                          |
| P02647  | Apolipoprotein A-I                           | APOA1    | 30759           | 366 (5)                          | 352 (5)                          |
| P01023  | Alpha-2-macroglobulin                        | A2M      | 164600          | 716 (11)                         | 1107 (19)                        |
| P01871  | Immunoglobulin heavy constant mu             | IGHM     | 49440           | 1006 (16)                        | 848 (13)                         |
| O43866  | CD5 antigen-like                             | CD5L     | 39603           | 112 (2)                          | 240 (4)                          |
| P02790  | Hemopexin                                    | HPX      | 29068           | 163 (3)                          | 160 (3)                          |
| P01876  | Ig alpha-1 chain C region                    | IGHA1    | 37655           | 236 (4)                          | 235 (4)                          |
| P04004  | Vitronectin                                  | VTN      | 55106           | 175 (3)                          | 177 (3)                          |
| P60709  | Actin, cytoplasmic 1                         | ACTB     | 42052           | 54 (1)                           | 167 (3)                          |
| P02679  | Fibrinogen gamma chain                       | FGG      | 50077           | 294 (5)                          | 334 (6)                          |
| P01859  | Ig gamma-2 chain C                           | IGHG2    | 35901           | 290 (6)                          | 229 (4)                          |
| P02549  | Spectrin alpha chain, erythrocytic 1         | SPTA1    | 282024          | 346 (7)                          | 268 (4)                          |
| P01009  | Alpha-1-antitrypsin                          | SERPINA1 | 46848           | 341 (5)                          | 345 (5)                          |
| P02671  | Fibrinogen alpha chain                       | FGA      | 70223           | 201 (3)                          | 137 (2)                          |
| P02768  | Serum albumin                                | ALB      | 68239           | 1614 (25)                        | 1298 (30)                        |
| O75636  | Ficolin-3                                    | FCN3     | 33395           | 425 (7)                          | 403 (6)                          |
| P00450  | Ceruloplasmin                                | CP       | 116197          | 218 (4)                          | 98 (2)                           |
| P01834  | Immunoglobulin kappa constant                | IGKC     | 11765           | 498 (7)                          | 304 (6)                          |
| P02745  | Complement C1q subcomponent subunit A        | C1QA     | 26285           | 110 (2)                          | 116 (2)                          |
| P12259  | Coagulation factor V                         | F5       | 252732          | 755 (13)                         | 417 (7)                          |
| P02743  | Pre-serum amyloid P component                | APCS     | 25495           | 130 (2)                          | 69 (1)                           |
| P00738  | Haptoglobin                                  | HP       | 45860           | 173 (3)                          | 128 (3)                          |
| P01024  | Complement C3                                | C3       | 114238          | 555 (9)                          | 388 (6)                          |
| P0CG05  | Ig lambda-2 chain C regions                  | IGLC2    | 11294           | 160 (3)                          | 59 (1)                           |
| P27105  | Erythrocyte band 7 integral membrane protein | STOM     | 31860           | 273 (4)                          | 158 (2)                          |
| P19827  | Inter-alpha-trypsin inhibitor heavy chain H1 | ITIH1    | 86480           | 233 (4)                          | 168 (3)                          |
| P02787  | Serotransferrin                              | TF       | 79280           | 852 (13)                         | 439 (6)                          |
| P19823  | Inter-alpha-trypsin inhibitor heavy chain H2 | ITIH2    | 103549          | 186 (3)                          | 53 (1)                           |
| Q14624  | Inter-alpha-trypsin inhibitor heavy chain H4 | ITIH4    | 103549          | 142 (2)                          | 67 (1)                           |
| P02746  | Complement C1q subcomponent subunit B        | C1QB     | 24154           | 96 (2)                           | 72 (1)                           |
| P0C0L4  | Complement component C4A                     | C4A      | 69042           | 214 (4)                          | 68 (1)                           |



|        |                      |      |        |         |                   |
|--------|----------------------|------|--------|---------|-------------------|
| P06396 | Gelsolin             | GSN  | 31052  | 103 (2) | N.D. <sup>b</sup> |
| P04114 | Apolipoprotein B-100 | APOB | 490939 | 159 (3) | 59 (1)            |

---

<sup>a</sup>Theoretical MW; <sup>b</sup>Not determined.

**Supplementary Table 4S.** Identification of PrC components for LF4-L and LF4-S, extruded at 200 nm and 100 nm (Large and Small size, respectively).

| Uniprot    | Protein                                      | Gene      | MW <sup>a</sup> | Mascot Score (Peptides) LF4-S | Mascot Score (Peptides) LF4-L |
|------------|----------------------------------------------|-----------|-----------------|-------------------------------|-------------------------------|
| A0A0C4DH42 | Immunoglobulin heavy variable 3-66           | IGHV3-66  | 12698           | 62 (1)                        | 125 (2)                       |
| P04196     | Histidine-rich glycoprotein                  | HRG       | 60510           | N.D. <sup>d</sup>             | 129 (2)                       |
| P01024     | Complement component C3                      | C3        | 114238          | N.D. <sup>b</sup>             | 95 (2)                        |
| P01023     | Alpha-2-macroglobulin precursor              | A2M       | 164600          | N.D. <sup>b</sup>             | 99 (2)                        |
| P02671     | Fibrinogen alpha chain                       | FGA       | 70223           | 153 (2)                       | 259 (4)                       |
| A0A0A0MRZ8 | Immunoglobulin kappa variable 3D-11          | IGKV3D-11 | 12625           | 71 (1)                        | 95 (2)                        |
| P01619     | Immunoglobulin kappa variable 3-20           | IGKV3-20  | 12557           | 152 (2)                       | 139 (2)                       |
| P02675     | Fibrinogen beta chain                        | FGB       | 52908           | 681 (11)                      | 412 (7)                       |
| P02768     | Serum albumin                                | ALB       | 68239           | 1175 (18)                     | 1153 (18)                     |
| P01871     | Immunoglobulin heavy constant mu             | IGHM      | 49440           | 803 (12)                      | 900 (15)                      |
| P01009     | Alpha-1-antitrypsin                          | SERPINA1  | 46848           | 258 (4)                       | 139 (2)                       |
| P02679     | Fibrinogen gamma chain                       | FGG       | 50077           | 157 (3)                       | 120 (2)                       |
| P01834     | Immunoglobulin kappa constant                | IGKC      | 11765           | 355 (5)                       | 316 (5)                       |
| P04004     | Vitronectin                                  | VTN       | 88853069        | 191 (3)                       | 143 (2)                       |
| P02747     | Complement C1q subcomponent subunit C        | C1QC      | 25985           | 236 (4)                       | 104 (2)                       |
| O75636     | Ficolin-3                                    | FCN3      | 33395           | 484 (8)                       | 334 (5)                       |
| O43866     | CD5 antigen-like                             | CD5L      | 39603           | 342 (5)                       | 145 (3)                       |
| P01876     | Ig alpha-1 chain C region                    | IGHA1     | 37655           | 260 (4)                       | 206 (3)                       |
| P12259     | Coagulation factor V                         | F5        | 252732          | 929 (16)                      | 698 (12)                      |
| P01859     | Ig gamma-2 chain C region                    | IGHG2     | 35901           | 393 (7)                       | 375 (7)                       |
| P02730     | Band 3 anion transport protein               | SLC4A1    | 102053          | 410 (6)                       | 171 (3)                       |
| P02745     | Complement C1q subcomponent subunit A        | C1QA      | 26285           | 113 (2)                       | 60 (1)                        |
| P0CG05     | Ig lambda-2 chain C regions                  | IGLC2     | 11294           | 103 (2)                       | 52 (1)                        |
| P32119     | Peroxiredoxin-2                              | PRDX2     | 20209           | 112 (2)                       | N.D. <sup>b</sup>             |
| P02647     | Apolipoprotein A-I                           | APOA1     | 30759           | 262 (3)                       | N.D. <sup>b</sup>             |
| P07996     | Thrombospondin-1                             | THBS1     | 133291          | 332 (6)                       | N.D. <sup>b</sup>             |
| P16157     | Ankyrin 1                                    | ANK1      | 209476          | 184 (3)                       | N.D. <sup>b</sup>             |
| P02746     | Complement C1q subcomponent subunit B        | C1QB      | 24154           | 225 (3)                       | 70 (1)                        |
| P27105     | Erythrocyte band 7 integral membrane protein | STOM      | 31860           | 747 (4)                       | N.D. <sup>b</sup>             |
| P60709     | Actin, cytoplasmic 1                         | ACTB      | 42052           | 151 (3)                       | N.D. <sup>b</sup>             |
| P02549     | Spectrin alpha chain, erythrocytic 1         | SPTA1     | 282024          | 343 (6)                       | N.D. <sup>b</sup>             |
| P11277     | Spectrin beta chain, erythrocytic            | SPTB      | 247171          | 509 (8)                       | N.D. <sup>b</sup>             |

<sup>a</sup>Theoretical MW; <sup>b</sup>Not determined.

**Supplementary Table 5S.** Identification of PrC components for LF5-L and LF5-S, extruded at 200 nm and 100 nm (Large and Small size, respectively).

| Uniprot    | Protein                                         | Gene     | MW <sup>a</sup> | Mascot Score (Peptides) LF5-S | Mascot Score (Peptides) LF5-L |
|------------|-------------------------------------------------|----------|-----------------|-------------------------------|-------------------------------|
| P06310     | Immunoglobulin kappa variable 2-30              | IGKV2-30 | 13185           | N.D. <sup>b</sup>             | 123 (2)                       |
| A0A0B4J1Y9 | Immunoglobulin heavy variable 3-72              | IGHV3-72 | 13203           | N.D. <sup>b</sup>             | 117 (2)                       |
| P04196     | Histidine-rich glycoprotein                     | HRG      | 60510           | N.D. <sup>b</sup>             | 198 (3)                       |
| P02730     | Band 3 anion transport protein                  | SLC4A1   | 102053          | N.D. <sup>b</sup>             | 178 (3)                       |
| P01619     | Immunoglobulin kappa variable 3-20              | IGKV3-20 | 12557           | N.D. <sup>b</sup>             | 174 (2)                       |
| P02671     | Fibrinogen alpha chain                          | FGA      | 70223           | N.D. <sup>b</sup>             | 177 (3)                       |
| P07996     | Thrombospondin-1 precursor                      | THBS1    | 133291          | N.D. <sup>b</sup>             | 154 (3)                       |
| P05155     | Plasma protease C1 inhibitor precursor          | SERPING1 | 55375           | N.D. <sup>b</sup>             | 110 (2)                       |
| P12259     | Coagulation factor V                            | F5       | 252732          | 312 (5)                       | 1171 (21)                     |
| P02765     | Alpha-2-HS-glycoprotein                         | AHSG     | 39341           | N.D. <sup>b</sup>             | 104 (2)                       |
| P08603     | Complement factor H                             | CFH      | 143694          | N.D. <sup>b</sup>             | 104 (2)                       |
| P00738     | Haptoglobin                                     | HP       | 45860           | 293 (5)                       | 363 (6)                       |
| P02649     | Apolipoprotein E                                | APOE     | 36302           | 233 (4)                       | 401 (6)                       |
| P02679     | Fibrinogen gamma chain                          | FGG      | 50077           | 309 (5)                       | 294 (5)                       |
| P01859     | Ig gamma-2 chain C region                       | IGHG2    | 35901           | 288 (5)                       | 327 (6)                       |
| P02790     | Hemopexin                                       | HPX      | 52254           | 181 (3)                       | 270 (5)                       |
| P01871     | Immunoglobulin heavy constant mu                | IGHM     | 49440           | 691 (12)                      | 756 (13)                      |
| P02768     | Serum albumin                                   | ALB      | 68239           | 1147 (18)                     | 1235 (21)                     |
| P01023     | Alpha-2-macroglobulin                           | A2M      | 164600          | 1430 (24)                     | 1516 (25)                     |
| P04004     | Vitronectin                                     | VTN      | 55106           | 129 (2)                       | 179 (3)                       |
| P02787     | Serotransferrin                                 | TF       | 79280           | 598 (9)                       | 1107 (16)                     |
| P25311     | Zinc-alpha2-glycoprotein                        | AZGP1    | 34079           | 103 (2)                       | 166 (3)                       |
| P00751     | Complement factor B                             | CFB      | 86819           | 124 (2)                       | 193 (3)                       |
| O43866     | CD5 antigen-like                                | CD5L     | 39603           | 97 (2)                        | 114 (2)                       |
| P19827     | Inter-alpha-trypsin inhibitor heavy chain ITIH1 | ITIH1    | 101795          | 279 (4)                       | 420 (6)                       |
| P0C0L4     | Complement component C4A                        | C4A      | 69042           | 136 (2)                       | 285 (5)                       |
| P02675     | Fibrinogen beta chain                           | FGB      | 52908           | 443 (7)                       | 734 (12)                      |
| P02743     | Serum amyloid P-component                       | APCS     | 25495           | 47 (1)                        | 110 (2)                       |
| O75636     | Ficolin-3                                       | FCN3     | 33395           | 448 (6)                       | 439 (7)                       |
| Q14624     | Inter-alpha-trypsin inhibitor heavy chain H4    | ITIH4    | 103549          | 341 (5)                       | 255 (4)                       |
| P02746     | Complement C1q subcomponent subunit B           | C1QB     | 24154           | 165 (3)                       | 140 (2)                       |
| P0CG05     | Ig lambda-2 chain C regions                     | IGLC2    | 11294           | 163 (3)                       | 181 (3)                       |
| P01009     | Alpha-1-antitrypsin                             | SERPINA1 | 46848           | 503 (7)                       | 566 (9)                       |
| P19823     | Inter-alpha-trypsin inhibitor heavy chain H2    | ITIH2    | 103549          | 133 (2)                       | 250 (4)                       |
| P02747     | Complement C1q subcomponent subunit C           | C1QC     | 25985           | 111 (2)                       | 123 (2)                       |
| P01834     | Immunoglobulin kappa constant                   | IGKC     | 11765           | 341 (5)                       | 384 (5)                       |
| P06396     | Gelsolin                                        | GSN      | 86043           | 124 (2)                       | 100 (2)                       |
| P01011     | Alpha-1-antichymotrypsin                        | SERPINA3 | 40690           | 157 (2)                       | 139 (2)                       |
| P01024     | Complement C3                                   | C3       | 114238          | 676 (10)                      | 889 (15)                      |
| P02647     | Apolipoprotein A-I                              | APOA1    | 30759           | 332 (4)                       | 354 (5)                       |
| P00450     | Ceruloplasmin                                   | CP       | 116197          | 594 (10)                      | 384 (6)                       |
| P01876     | Ig alpha-1 chain C region                       | IGHA1    | 37655           | 226 (4)                       | 121 (2)                       |
| Q15485     | Ficolin-2                                       | FCN2     | 34436           | 325 (5)                       | 144 (2)                       |
| P06727     | Apolipoprotein A-IV                             | APOA4    | 45353           | 109 (2)                       | N.D. <sup>b</sup>             |

<sup>a</sup> Theoretical MW; <sup>b</sup> Not determine.

**Supplementary Table 6S.** Quantitative proteomic analysis of PrC components for all LFs at 200 nm extrusion size.

| Gene      | Rsc (LF2 vs LF1) | Rsc (LF3 vs LF1) | Rsc (LF3 vs LF2) | Rsc (LF4 vs LF1) | Rsc (LF4 vs LF2) | Rsc (LF4 vs LF3) | Rsc (LF5 vs LF1) | Rsc (LF5 vs LF2) | Rsc (LF5 vs LF3) | Rsc (LF5 vs LF4) |
|-----------|------------------|------------------|------------------|------------------|------------------|------------------|------------------|------------------|------------------|------------------|
| AHSG      | -3,36            | -3,17            | 0,19             | -1,48            | 1,88             | 1,69             | 0,77             | 4,13             | 3,93             | 2,24             |
| FCN2      | -4,32            | -0,42            | 3,90             | -2,44            | 1,88             | -2,01            | -0,58            | 3,74             | -0,16            | 1,85             |
| SERPING1  | 0,73             | 0,92             | 0,19             | 2,61             | 1,88             | 1,69             | 4,23             | 3,50             | 3,30             | 1,61             |
| AZGP1     | 0,73             | 0,92             | 0,19             | 2,61             | 1,88             | 1,69             | 3,94             | 3,21             | 3,01             | 1,32             |
| APCS      | 0,73             | 3,25             | 2,52             | 2,61             | 1,88             | -0,63            | 3,94             | 3,21             | 0,69             | 1,32             |
| IGKV3-20  | 0,73             | 0,92             | 0,19             | 6,09             | 5,36             | 5,16             | 3,94             | 3,21             | 3,01             | -2,15            |
| IGKV3-15  | -2,44            | 0,92             | 3,37             | 2,62             | 5,06             | 1,70             | 0,77             | 3,21             | -0,16            | -1,86            |
| IGKV3D-11 | 0,73             | 0,92             | 0,19             | 5,79             | 5,06             | 4,87             | 3,57             | 2,84             | 2,65             | -2,22            |
| FGA       | -1,75            | 0,69             | 2,44             | 1,74             | 3,49             | 1,05             | 0,34             | 2,09             | -0,35            | -1,40            |
| FCN3      | -1,95            | -0,58            | 1,37             | 0,84             | 2,78             | 1,41             | -0,15            | 1,79             | 0,42             | -0,99            |
| FGG       | -0,12            | 0,44             | 0,56             | 1,30             | 1,42             | 0,86             | 1,58             | 1,70             | 1,14             | 0,28             |
| HP        | -0,70            | -0,25            | 0,45             | -3,78            | -3,08            | -3,53            | 0,94             | 1,64             | 1,19             | 4,72             |
| IGKV2-30  | -0,01            | -2,99            | -2,98            | -1,30            | -1,29            | 1,69             | 1,11             | 1,11             | 4,10             | 2,40             |
| C1QB      | -1,72            | -0,55            | 1,17             | -1,02            | 0,70             | -0,47            | -0,65            | 1,07             | -0,10            | 0,37             |
| FGB       | -0,45            | 0,82             | 1,27             | 1,91             | 2,36             | 1,09             | 0,62             | 1,07             | -0,20            | -1,29            |
| IGKC      | -0,20            | 0,22             | 0,41             | 1,88             | 2,07             | 1,66             | 0,81             | 1,00             | 0,59             | -1,07            |
| A2M       | 1,47             | 1,38             | -0,09            | -0,16            | -1,63            | -1,53            | 2,45             | 0,98             | 1,08             | 2,61             |
| ALB       | 0,36             | 0,82             | 0,46             | 0,54             | 0,18             | -0,28            | 1,23             | 0,88             | 0,41             | 0,69             |
| C4A       | 0,16             | 0,02             | -0,14            | 0,36             | 0,20             | 0,34             | 1,02             | 0,86             | 1,00             | 0,66             |
| HPX       | 0,89             | 0,93             | 0,03             | -1,48            | -2,37            | -2,40            | 1,73             | 0,83             | 0,80             | 3,20             |
| TF        | 0,35             | -0,21            | -0,57            | -0,91            | -1,27            | -0,70            | 0,89             | 0,54             | 1,10             | 1,80             |
| C3        | 1,02             | -0,03            | -1,05            | -0,56            | -1,58            | -0,53            | 1,54             | 0,52             | 1,57             | 2,10             |
| IGHV3-72  | 0,73             | -2,99            | -3,72            | -1,30            | -2,03            | 1,69             | 1,25             | 0,52             | 4,24             | 2,55             |
| IGLC2     | 0,10             | -0,25            | -0,35            | -3,71            | -3,81            | -3,45            | 0,62             | 0,52             | 0,87             | 4,32             |
| CFH       | 3,54             | 5,58             | 2,04             | 2,61             | -0,93            | -2,96            | 3,94             | 0,40             | -1,64            | 1,32             |
| C4BPA     | -0,55            | -0,36            | 0,19             | -1,48            | -0,93            | -1,12            | -0,15            | 0,40             | 0,20             | 1,32             |
| APOE      | -0,58            | -2,43            | -1,85            | -4,20            | -3,62            | -1,77            | -0,25            | 0,33             | 2,18             | 3,95             |
| ITIH4     | 0,13             | -1,63            | -1,76            | -2,75            | -2,88            | -1,12            | 0,45             | 0,32             | 2,09             | 3,20             |
| GSN       | -0,01            | -2,99            | -2,98            | -1,30            | -1,29            | 1,69             | 0,32             | 0,32             | 3,30             | 1,61             |
| SERPINA1  | 0,21             | 0,30             | 0,09             | -0,10            | -0,30            | -0,40            | 0,34             | 0,13             | 0,04             | 0,43             |
| ITIH2     | 0,62             | -0,13            | -0,75            | -2,15            | -2,77            | -2,01            | 0,66             | 0,03             | 0,79             | 2,80             |
| ANXA1     | 0,73             | 4,39             | 3,66             | 2,61             | 1,88             | -1,77            | 0,76             | 0,03             | -3,62            | -1,85            |
| HSP90AA1  | 0,73             | 5,32             | 4,59             | 2,61             | 1,88             | -2,71            | 0,76             | 0,03             | -4,56            | -1,85            |
| IGHV1-3   | -2,73            | -2,54            | 0,19             | -0,85            | 1,88             | 1,69             | -2,70            | 0,03             | -0,16            | -1,85            |
| APOA4     | -2,97            | -2,78            | 0,19             | -1,09            | 1,88             | 1,69             | -2,94            | 0,03             | -0,16            | -1,85            |
| STOM      | -3,18            | 0,19             | 3,37             | -1,30            | 1,88             | -1,48            | -3,15            | 0,03             | -3,33            | -1,85            |
| CFHR1     | -3,18            | 1,11             | 4,29             | -1,30            | 1,88             | -2,40            | -3,15            | 0,03             | -4,25            | -1,85            |
| JUP       | -3,80            | -0,14            | 3,66             | -1,91            | 1,88             | -1,77            | -3,76            | 0,03             | -3,62            | -1,85            |
| LBP       | -4,03            | -3,84            | 0,19             | -2,15            | 1,88             | 1,69             | -4,00            | 0,03             | -0,16            | -1,85            |
| DSP       | -4,23            | 1,26             | 5,49             | -2,35            | 1,88             | -3,61            | -4,20            | 0,03             | -5,46            | -1,85            |
| CP        | 1,70             | 0,54             | -1,16            | -1,48            | -3,17            | -2,01            | 1,64             | -0,06            | 1,10             | 3,11             |
| IGHG3     | 0,02             | 0,03             | 0,01             | -6,61            | -6,63            | -6,64            | -0,21            | -0,24            | -0,25            | 6,40             |
| APOA1     | -0,43            | -0,44            | 0,00             | -4,12            | -3,69            | -3,68            | -0,67            | -0,24            | -0,23            | 3,45             |
| C1QA      | -0,30            | 0,12             | 0,43             | 0,77             | 1,07             | 0,64             | -0,55            | -0,24            | -0,67            | -1,31            |
| SERPINA3  | 0,73             | 1,37             | 0,64             | -0,85            | -1,58            | -2,22            | 0,48             | -0,26            | -0,90            | 1,32             |
| CFB       | 5,13             | 3,73             | -1,40            | 2,61             | -2,52            | -1,12            | 4,86             | -0,27            | 1,12             | 2,24             |
| C1QC      | -0,38            | 0,38             | 0,76             | 0,61             | 0,99             | 0,23             | -0,69            | -0,32            | -1,07            | -1,30            |
| CD5L      | -0,87            | -1,10            | -0,24            | -0,01            | 0,86             | 1,09             | -1,26            | -0,40            | -0,16            | -1,25            |
| ORM1      | 2,45             | -1,89            | -4,34            | -0,19            | -2,65            | 1,69             | 2,05             | -0,40            | 3,93             | 2,24             |
| ITIH1     | 1,34             | 0,31             | -1,04            | 0,41             | -0,93            | 0,11             | 0,89             | -0,46            | 0,58             | 0,47             |
| APOL1     | 1,26             | -2,25            | -3,51            | -0,56            | -1,82            | 1,69             | 0,77             | -0,50            | 3,01             | 1,32             |
| IGHG2     | 0,29             | -0,24            | -0,53            | 0,37             | 0,08             | 0,60             | -0,29            | -0,58            | -0,05            | -0,66            |
| ACTB      | -0,78            | -0,03            | 0,74             | -4,03            | -3,26            | -4,00            | -1,49            | -0,71            | -1,45            | 2,55             |
| HRG       | 1,22             | 1,27             | 0,05             | 1,52             | 0,30             | 0,25             | 0,32             | -0,90            | -0,95            | -1,20            |
| F5        | -1,34            | -2,86            | -1,52            | -1,39            | -0,05            | 1,47             | -2,36            | -1,02            | 0,50             | -0,97            |
| IGJ       | 0,73             | -0,24            | -0,97            | 1,22             | 0,49             | 1,46             | -0,40            | -1,13            | -0,16            | -1,62            |
| THBS1     | 0,43             | 2,07             | 1,64             | 0,59             | 0,16             | -1,48            | -0,72            | -1,15            | -2,80            | -1,31            |
| GC        | 0,73             | 0,67             | -0,06            | -2,03            | -2,77            | -2,71            | -0,42            | -1,16            | -1,10            | 1,61             |
| VTN       | -0,13            | -0,81            | -0,67            | -0,16            | -0,03            | 0,64             | -1,33            | -1,20            | -0,52            | -1,17            |
| IGHA2     | -0,26            | -1,05            | -0,79            | 0,15             | 0,41             | 1,20             | -1,88            | -1,62            | -0,83            | -2,03            |
| IGHA1     | -0,47            | -1,36            | -0,89            | -0,12            | 0,35             | 1,24             | -2,13            | -1,66            | -0,77            | -2,01            |
| IGHM      | 0,49             | -0,25            | -0,73            | 0,92             | 0,43             | 1,17             | -1,19            | -1,67            | -0,94            | -2,11            |
| SLC4A1    | 0,35             | 1,13             | 0,78             | 0,46             | 0,10             | -0,67            | -1,54            | -1,90            | -2,68            | -2,00            |
| A1BG      | 3,90             | 0,92             | -2,98            | 2,61             | -1,29            | 1,69             | 0,76             | -3,14            | -0,16            | -1,85            |
| CLU       | -0,67            | 1,20             | 1,87             | -2,25            | -1,58            | -3,45            | -4,10            | -3,43            | -5,30            | -1,85            |

|       |      |       |       |       |       |       |       |       |       |       |
|-------|------|-------|-------|-------|-------|-------|-------|-------|-------|-------|
| PRDX2 | 0,34 | 0,01  | -0,34 | -1,48 | -1,82 | -1,48 | -3,33 | -3,67 | -3,33 | -1,85 |
| ANK1  | 0,84 | 2,21  | 1,37  | -2,15 | -2,98 | -4,36 | -4,00 | -4,83 | -6,21 | -1,85 |
| SPTA1 | 1,18 | 1,54  | 0,36  | -3,07 | -4,25 | -4,61 | -4,92 | -6,10 | -6,46 | -1,85 |
| SPTB  | 1,54 | 2,34  | 0,80  | -0,42 | -1,96 | -2,76 | -4,60 | -6,14 | -6,94 | -4,18 |
| APOB  | 0,88 | -0,86 | -1,75 | -3,71 | -4,59 | -2,84 | -5,56 | -6,44 | -4,69 | -1,85 |

Proteins in grey with  $Rsc \geq 1.40$  or  $\leq -1.40$  were considered differentially represented.

**Supplementary Table 7S.** Quantitative proteomic analysis of PrC components for all LFs at 100 nm extrusion size.

| Gene     | Rsc (LF2 vs LF1) | Rsc (LF3 vs LF1) | Rsc (LF3 vs LF2) | Rsc (LF4 vs LF1) | Rsc (LF4 vs LF2) | Rsc (LF4 vs LF3) | Rsc (LF5 vs LF1) | Rsc (LF5 vs LF2) | Rsc (LF5 vs LF3) | Rsc (LF5 vs LF4) |
|----------|------------------|------------------|------------------|------------------|------------------|------------------|------------------|------------------|------------------|------------------|
| APOB     | -5,75            | -0,20            | 5,55             | -4,84            | 0,90             | -4,65            | -0,29            | 5,46             | -0,09            | 4,55             |
| AZGP1    | 0,10             | 0,59             | 0,49             | 1,01             | 0,90             | 0,41             | 4,37             | 4,26             | 3,77             | 3,36             |
| CP       | 3,28             | 5,13             | 1,85             | 1,01             | -2,27            | -4,12            | 6,54             | 3,27             | 1,42             | 5,54             |
| FCN2     | -0,30            | -4,46            | -4,16            | -0,34            | -0,04            | 4,12             | 1,37             | 1,66             | 5,82             | 1,70             |
| IGKC     | -0,90            | -0,33            | 0,58             | 0,22             | 1,12             | 0,54             | 0,55             | 1,46             | 0,88             | 0,34             |
| IGLC2    | -0,80            | -0,24            | 0,56             | 0,06             | 0,85             | 0,29             | 0,45             | 1,24             | 0,68             | 0,39             |
| A2M      | 2,51             | 2,25             | -0,26            | -3,52            | -6,03            | -5,77            | 3,62             | 1,11             | 1,37             | 7,14             |
| C3       | 0,71             | 0,74             | 0,03             | -5,39            | -6,10            | -6,14            | 1,70             | 0,99             | 0,96             | 7,09             |
| APOA1    | -0,78            | -0,51            | 0,28             | -1,06            | -0,28            | -0,55            | 0,16             | 0,94             | 0,66             | 1,22             |
| IGKV3-20 | -3,07            | 0,89             | 3,96             | 1,30             | 4,37             | 0,41             | -2,27            | 0,80             | -3,16            | -3,57            |
| STOM     | -3,36            | 1,05             | 4,40             | 1,01             | 4,37             | -0,04            | -2,56            | 0,80             | -3,61            | -3,57            |
| IGHV1-3  | -3,60            | -3,11            | 0,49             | -2,70            | 0,90             | 0,41             | -2,80            | 0,80             | 0,31             | -0,11            |
| C4BPA    | -3,60            | -0,79            | 2,82             | -2,70            | 0,90             | -1,91            | -2,80            | 0,80             | -2,02            | -0,11            |
| IGKV3-15 | -3,81            | -0,14            | 3,66             | 0,56             | 4,37             | 0,70             | -3,01            | 0,80             | -2,87            | -3,57            |
| LBP      | -4,66            | -4,17            | 0,49             | -3,76            | 0,90             | 0,41             | -3,86            | 0,80             | 0,31             | -0,11            |
| FGG      | -0,36            | -0,10            | 0,26             | -0,43            | -0,07            | -0,33            | 0,33             | 0,70             | 0,44             | 0,77             |
| FCN3     | -1,16            | -0,87            | 0,29             | -0,08            | 1,09             | 0,79             | -0,52            | 0,64             | 0,35             | -0,45            |
| ITIH4    | 1,61             | 1,23             | -0,38            | -0,13            | -1,74            | -1,36            | 2,21             | 0,60             | 0,98             | 2,34             |
| SERPINA3 | 0,35             | -2,87            | -3,21            | -2,45            | -2,80            | 0,41             | 0,91             | 0,56             | 3,77             | 3,36             |
| IGJ      | -0,59            | -0,63            | -0,04            | -0,22            | 0,37             | 0,41             | -0,03            | 0,56             | 0,60             | 0,19             |
| ITIH2    | 2,84             | 2,67             | -0,16            | -1,32            | -4,15            | -3,99            | 3,35             | 0,51             | 0,68             | 4,66             |
| FGB      | -0,22            | -0,24            | -0,02            | -0,04            | 0,18             | 0,20             | 0,13             | 0,35             | 0,36             | 0,17             |
| C1QB     | -0,78            | -0,34            | 0,44             | 0,90             | 1,68             | 1,24             | -0,43            | 0,34             | -0,10            | -1,34            |
| HPX      | 0,10             | -0,10            | -0,20            | -3,39            | -3,49            | -3,29            | 0,42             | 0,31             | 0,52             | 3,81             |
| CFB      | 3,81             | 2,92             | -0,89            | 1,01             | -2,80            | -1,91            | 4,08             | 0,27             | 1,16             | 3,07             |
| VTN      | -1,44            | -0,44            | 1,00             | 0,52             | 1,96             | 0,95             | -1,19            | 0,25             | -0,75            | -1,71            |
| C4A      | 1,14             | 1,37             | 0,22             | -0,71            | -1,85            | -2,08            | 1,34             | 0,20             | -0,02            | 2,06             |
| ALB      | 0,74             | 1,16             | 0,42             | -0,42            | -1,16            | -1,58            | 0,94             | 0,20             | -0,22            | 1,36             |
| TF       | 0,41             | 0,57             | 0,16             | -2,00            | -2,41            | -2,57            | 0,58             | 0,17             | 0,01             | 2,58             |
| HP       | 0,47             | 0,50             | 0,03             | -0,58            | -1,05            | -1,08            | 0,63             | 0,17             | 0,14             | 1,22             |
| C1QC     | -0,06            | 0,31             | 0,37             | 0,85             | 0,92             | 0,54             | 0,08             | 0,14             | -0,23            | -0,78            |
| GSN      | 4,02             | 3,41             | -0,61            | 1,01             | -3,01            | -2,40            | 4,08             | 0,06             | 0,67             | 3,07             |
| SERPINA1 | 0,41             | 0,60             | 0,20             | -0,84            | -1,25            | -1,45            | 0,40             | 0,00             | -0,20            | 1,25             |
| IGHA1    | -0,93            | -1,04            | -0,11            | 0,13             | 1,05             | 1,16             | -1,09            | -0,17            | -0,06            | -1,22            |
| IGHG3    | 0,34             | -0,08            | -0,42            | 0,53             | 0,20             | 0,61             | 0,10             | -0,24            | 0,18             | -0,44            |
| ITIH1    | 5,24             | 5,25             | 0,01             | 1,01             | -4,24            | -4,24            | 5,00             | -0,24            | -0,25            | 3,99             |
| IGHG2    | 0,12             | -0,32            | -0,44            | 0,56             | 0,44             | 0,88             | -0,16            | -0,28            | 0,16             | -0,72            |
| CFH      | 3,57             | 3,77             | 0,20             | 1,01             | -2,56            | -2,76            | 3,23             | -0,34            | -0,54            | 2,22             |
| CLU      | -0,17            | 0,11             | 0,28             | -4,13            | -3,96            | -4,24            | -0,53            | -0,36            | -0,64            | 3,60             |
| GC       | -0,46            | -0,66            | -0,20            | -3,96            | -3,49            | -3,29            | -0,89            | -0,43            | -0,22            | 3,07             |
| C1QA     | -1,16            | -0,14            | 1,02             | 0,08             | 1,25             | 0,23             | -1,72            | -0,56            | -1,58            | -1,81            |
| APCS     | 1,00             | 0,60             | -0,40            | -1,80            | -2,80            | -2,40            | 0,42             | -0,58            | -0,18            | 2,22             |
| FGA      | -0,05            | -0,79            | -0,74            | -0,58            | -0,53            | 0,21             | -0,69            | -0,63            | 0,10             | -0,11            |
| IGHA2    | -0,93            | -1,15            | -0,22            | 0,16             | 1,09             | 1,31             | -1,63            | -0,70            | -0,48            | -1,79            |
| IGHM     | -1,14            | -1,00            | 0,14             | 0,11             | 1,24             | 1,10             | -1,91            | -0,77            | -0,92            | -2,02            |
| CD5L     | -0,74            | -1,34            | -0,61            | 0,06             | 0,79             | 1,40             | -1,86            | -1,12            | -0,52            | -1,92            |
| APOA4    | 4,36             | 0,59             | -3,76            | 1,01             | -3,35            | 0,41             | 3,23             | -1,13            | 2,63             | 2,22             |
| APOE     | -1,23            | -2,88            | -1,65            | -6,18            | -4,95            | -3,29            | -2,37            | -1,14            | 0,52             | 3,81             |
| ACTB     | 0,10             | -0,44            | -0,55            | -0,03            | -0,13            | 0,42             | -1,07            | -1,18            | -0,63            | -1,04            |
| IGHV3-9  | 3,57             | 0,59             | -2,97            | 1,01             | -2,56            | 0,41             | 0,90             | -2,66            | 0,31             | -0,11            |
| CAT      | 3,57             | 3,41             | -0,16            | 1,01             | -2,56            | -2,40            | 0,90             | -2,66            | -2,50            | -0,11            |
| HRG      | 1,24             | 1,45             | 0,20             | -1,32            | -2,56            | -2,76            | -1,42            | -2,66            | -2,87            | -0,11            |
| ANK1     | 4,02             | 5,13             | 1,11             | 4,47             | 0,46             | -0,66            | 0,90             | -3,11            | -4,23            | -3,57            |
| PRDX2    | 0,29             | -0,51            | -0,79            | -0,58            | -0,86            | -0,07            | -3,01            | -3,29            | -2,50            | -2,43            |
| F5       | -0,19            | -1,07            | -0,87            | -0,20            | -0,01            | 0,86             | -3,50            | -3,31            | -2,43            | -3,30            |
| THBS1    | 0,25             | 1,64             | 1,40             | 1,82             | 1,57             | 0,17             | -3,35            | -3,60            | -5,00            | -5,17            |
| SPTB     | 5,40             | 5,36             | -0,04            | 5,98             | 0,58             | 0,62             | 0,90             | -4,50            | -4,46            | -5,08            |
| SPTA1    | 6,70             | 5,74             | -0,96            | 6,32             | -0,39            | 0,58             | 0,90             | -5,80            | -4,84            | -5,41            |
| SLC4A1   | 1,74             | 1,25             | -0,49            | 1,88             | 0,14             | 0,63             | -4,54            | -6,28            | -5,79            | -6,42            |

Proteins in grey with Rsc  $\geq 1.40$  or  $\leq -1.40$  were considered differentially represented.

**Supplementary Table 8S.** Differential proteins shared by different pairwise comparisons at the two extrusion sizes.

| Pairwise comparison   | Shared proteins                              | Gene     | Rsc (100 nm) | Rsc (200 nm) |
|-----------------------|----------------------------------------------|----------|--------------|--------------|
| <b>LF2 versus LF1</b> | Spectrin beta chain, erythrocytic            | SPTB     | 5,40         | 1,54         |
|                       | Apolipoprotein A-IV                          | APOA4    | 4,36         | -2,97        |
|                       | Complement factor B                          | CFB      | 3,81         | 5,13         |
|                       | Complement factor H                          | CFH      | 3,57         | 3,54         |
|                       | Ceruloplasmin                                | CP       | 3,28         | 1,70         |
|                       | Alpha-2-macroglobulin                        | A2M      | 2,51         | 1,47         |
|                       | Erythrocyte band 7 integral membrane protein | STOM     | -3,36        | -3,18        |
|                       | Immunoglobulin heavy variable 1-3            | IGHV1-3  | -3,60        | -2,73        |
|                       | Immunoglobulin kappa variable 3-15           | IGKV3-15 | -3,81        | -2,44        |
|                       | Lipopolysaccharide-binding protein           | LBP      | -4,66        | -4,03        |
| <b>LF3 versus LF1</b> | Spectrin alpha chain, erythrocytic 1         | SPTA1    | 5,74         | 1,54         |
|                       | Spectrin beta chain, erythrocytic            | SPTB     | 5,36         | 2,34         |
|                       | Ankyrin-1                                    | ANK1     | 5,13         | 2,21         |
|                       | Complement factor H                          | CFH      | 3,77         | 5,58         |
|                       | Gelsolin                                     | GSN      | 3,41         | -2,99        |
|                       | Complement factor B                          | CFB      | 2,92         | 3,73         |
|                       | Thrombospondin-1                             | THBS1    | 1,64         | 2,07         |
|                       | Apolipoprotein E                             | APOE     | -2,88        | -2,43        |
|                       | Immunoglobulin heavy variable 1-3            | IGHV1-3  | -3,11        | -2,54        |
|                       | Lipopolysaccharide-binding protein           | LBP      | -4,17        | -3,84        |
|                       | Haptoglobin                                  | HP       | -4,63        | -4,70        |
| <b>LF3 versus LF2</b> | Apolipoprotein B-100                         | APOB     | 5,55         | -1,75        |
|                       | Erythrocyte band 7 integral membrane protein | STOM     | 4,40         | 3,37         |
|                       | Immunoglobulin kappa variable 3-15           | IGKV3-15 | 3,66         | 3,37         |
|                       | Thrombospondin-1                             | THBS1    | 1,40         | 1,64         |
|                       | Apolipoprotein E                             | APOE     | -1,65        | -1,85        |
|                       | Ficolin-2                                    | FCN2     | -4,16        | 3,90         |
|                       | Haptoglobin                                  | HP       | -4,65        | -3,72        |
| <b>LF4 versus LF1</b> | Spectrin alpha chain, erythrocytic 1         | SPTA1    | 6,32         | -3,07        |
|                       | Ankyrin-1                                    | ANK1     | 4,47         | -2,15        |
|                       | Serum amyloid P-component                    | APCS     | -1,80        | 2,61         |
|                       | C4b-binding protein alpha chain              | C4BPA    | -2,70        | -1,48        |
|                       | Hemopexin                                    | HPX      | -3,39        | -1,48        |
|                       | Lipopolysaccharide-binding protein           | LBP      | -3,76        | -2,15        |
|                       | Vitamin D-binding protein                    | GC       | -3,96        | -2,03        |
|                       | Clusterin                                    | CLU      | -4,13        | -2,25        |
|                       | Apolipoprotein B-100                         | APOB     | -4,84        | -3,71        |
|                       | Apolipoprotein E                             | APOE     | -6,18        | -4,20        |
| <b>LF4 versus LF2</b> | Immunoglobulin kappa variable 3-15           | IGKV3-15 | 4,37         | 5,06         |
|                       | Erythrocyte band 7 integral membrane protein | STOM     | 4,37         | 1,88         |
|                       | Immunoglobulin kappa variable 3-20           | IGKV3-20 | 4,37         | 5,36         |
|                       | Inter-alpha-trypsin inhibitor heavy chain H4 | ITIH4    | -1,74        | -2,88        |
|                       | Ceruloplasmin                                | CP       | -2,27        | -3,17        |
|                       | Alpha-1-antichymotrypsin                     | SERPINA3 | -2,80        | -1,58        |
|                       | Serum amyloid P-component                    | APCS     | -2,80        | 1,88         |
|                       | Complement factor B                          | CFB      | -2,80        | -2,52        |
|                       | Apolipoprotein A-IV                          | APOA4    | -3,35        | 1,88         |
|                       | Vitamin D-binding protein                    | GC       | -3,49        | -2,77        |
|                       | Hemopexin                                    | HPX      | -3,49        | -2,37        |

|                       |                                              |          |       |       |
|-----------------------|----------------------------------------------|----------|-------|-------|
|                       | Clusterin                                    | CLU      | -3,96 | -1,58 |
|                       | Inter-alpha-trypsin inhibitor heavy chain H2 | ITIH2    | -4,15 | -2,77 |
|                       | Apolipoprotein E                             | APOE     | -4,95 | -3,62 |
|                       | Alpha-2-macroglobulin                        | A2M      | -6,03 | -1,63 |
|                       | Complement C3                                | C3       | -6,10 | -1,58 |
| <b>LF4 versus LF3</b> | Ficolin-2                                    | FCN2     | 4,12  | -2,01 |
|                       | Gelsolin                                     | GSN      | -2,40 | 1,69  |
|                       | Complement factor H                          | CFH      | -2,76 | -2,96 |
|                       | Vitamin D-binding protein                    | GC       | -3,29 | -2,71 |
|                       | Hemopexin                                    | HPX      | -3,29 | -2,40 |
|                       | Apolipoprotein E                             | APOE     | -3,29 | -1,77 |
|                       | Inter-alpha-trypsin inhibitor heavy chain H2 | ITIH2    | -3,99 | -2,01 |
|                       | Ceruloplasmin                                | CP       | -4,12 | -2,01 |
|                       | Clusterin                                    | CLU      | -4,24 | -3,45 |
|                       | Apolipoprotein B-100                         | APOB     | -4,65 | -2,84 |
|                       | Alpha-2-macroglobulin                        | A2M      | -5,77 | -1,53 |
| <b>LF5 versus LF1</b> | Ceruloplasmin                                | CP       | 6,54  | 1,64  |
|                       | Zinc-alpha-2-glycoprotein                    | AZGP1    | 4,37  | 3,94  |
|                       | Complement factor B                          | CFB      | 4,08  | 4,86  |
|                       | Alpha-2-macroglobulin                        | A2M      | 3,62  | 2,45  |
|                       | Apolipoprotein A-IV                          | APOA4    | 3,23  | -2,94 |
|                       | Complement factor H                          | CFH      | 3,23  | 3,94  |
|                       | Complement C3                                | C3       | 1,70  | 1,54  |
|                       | Immunoglobulin alpha-2 heavy chain           | GHA2     | -1,63 | -1,88 |
|                       | Immunoglobulin kappa variable 3-20           | IGKV3-20 | -2,27 | 3,94  |
|                       | Erythrocyte band 7 integral membrane protein | STOM     | -2,56 | -3,15 |
|                       | Immunoglobulin heavy variable 1-3            | IGHV1-3  | -2,80 | -2,70 |
|                       | Peroxiredoxin-2                              | PRDX2    | -3,01 | -3,33 |
|                       | Coagulation factor V                         | F5       | -3,50 | -2,36 |
|                       | Lipopolysaccharide-binding protein           | LBP      | -3,86 | -4,00 |
|                       | Band 3 anion transport protein               | SLC4A1   | -4,54 | -1,54 |
| <b>LF5 versus LF2</b> | Apolipoprotein B-100                         | APOB     | 5,46  | -6,44 |
|                       | Zinc-alpha-2-glycoprotein                    | AZGP1    | 4,26  | 3,21  |
|                       | Ficolin-2                                    | FCN2     | 1,66  | 3,74  |
|                       | Ankyrin-1                                    | ANK1     | -3,11 | -4,83 |
|                       | Peroxiredoxin-2                              | PRDX2    | -3,29 | -3,67 |
|                       | Haptoglobin                                  | HP       | -4,34 | 1,42  |
|                       | Spectrin beta chain, erythrocytic            | SPTB     | -4,50 | -6,14 |
|                       | Spectrin alpha chain, erythrocytic 1         | SPTA1    | -5,80 | -6,10 |
|                       | Band 3 anion transport protein               | SLC4A1   | -6,28 | -1,90 |
| <b>LF5 versus LF3</b> | Zinc-alpha-2-glycoprotein                    | AZGP1    | 3,77  | 3,01  |
|                       | Immunoglobulin kappa variable 3-20           | IGKV3-20 | -3,16 | 3,01  |
|                       | Peroxiredoxin-2                              | PRDX2    | -3,33 | -3,33 |
|                       | Erythrocyte band 7 integral membrane protein | STOM     | -3,61 | -3,33 |
|                       | Ankyrin-1                                    | ANK1     | -4,23 | -6,21 |
|                       | Spectrin beta chain, erythrocytic            | SPTB     | -4,46 | -6,94 |
|                       | Spectrin alpha chain, erythrocytic 1         | SPTA1    | -4,84 | -6,46 |
|                       | Thrombospondin-1                             | THBS1    | -5,00 | -2,80 |
|                       | Band 3 anion transport protein               | SLC4A1   | -5,79 | -2,68 |
| <b>LF5 versus LF4</b> | Alpha-2-macroglobulin                        | A2M      | 7,14  | 2,61  |
|                       | Complement C3                                | C3       | 7,09  | 2,10  |
|                       | Ceruloplasmin                                | CP       | 5,54  | 3,11  |
|                       | Inter-alpha-trypsin inhibitor heavy chain H2 | ITIH2    | 4,66  | 2,80  |



|                                              |          |       |       |
|----------------------------------------------|----------|-------|-------|
| Apolipoprotein B-100                         | APOB     | 4,55  | -1,85 |
| Hemopexin                                    | HPX      | 3,81  | 3,20  |
| Apolipoprotein E                             | APOE     | 3,81  | 3,95  |
| Clusterin                                    | CLU      | 3,60  | -1,85 |
| Complement factor B                          | CFB      | 3,07  | 2,24  |
| Gelsolin                                     | GSN      | 3,07  | 1,61  |
| Vitamin D-binding protein                    | GC       | 3,07  | 1,61  |
| Serotransferrin                              | TF       | 2,58  | 1,80  |
| Inter-alpha-trypsin inhibitor heavy chain H4 | ITIH4    | 2,34  | 3,20  |
| Apolipoprotein A-IV                          | APOA4    | 2,22  | -1,85 |
| Ficolin-2                                    | FCN2     | 1,70  | 1,85  |
| Immunoglobulin alpha-2 heavy chain           | IGHA2    | -1,79 | -2,03 |
| Immunoglobulin heavy constant mu             | IGHM     | -2,02 | -2,11 |
| Peroxiredoxin-2                              | PRDX2    | -2,43 | -1,85 |
| Immunoglobulin kappa variable 3-15           | IGKV3-15 | -3,57 | -1,86 |
| Ankyrin-1                                    | ANK1     | -3,57 | -1,85 |
| Erythrocyte band 7 integral membrane protein | STOM     | -3,57 | -1,85 |
| Immunoglobulin kappa variable 3-20           | IGKV3-20 | -3,57 | -2,15 |
| Spectrin beta chain, erythrocytic            | SPTB     | -5,08 | -4,18 |
| Spectrin alpha chain, erythrocytic 1         | SPTA1    | -5,41 | -1,85 |
| Band 3 anion transport protein               | SLC4A1   | -6,42 | -2,00 |

Proteins in grey had opposite expression levels in the corona of pairwise comparison groups at the two different extrusion sizes.
